## SHORT COMMUNICATION

# Facultative hyperthermia during a heatwave delays injurious dehydration of an arboreal marsupial

James M. Turner\*

**ABSTRACT**

Heatwaves negatively impact wildlife populations and their effects are predicted to worsen with ongoing global warming. Animal mass mortality at extremely high ambient temperature ( $T_a$ ) is evidence for physiological dysfunction and, to aid conservation efforts, improving our understanding of animal responses to environmental heat is crucial. To address this, I measured the water loss, body temperature and metabolism of an Australian marsupial during a simulated heatwave. The body temperature of the common ringtail possum *Pseudocheirus peregrinus* increased passively by  $\sim 3^\circ\text{C}$  over a  $T_a$  of  $29\text{--}39^\circ\text{C}$ , conveying water savings of  $9.6\text{ ml h}^{-1}$ . When  $T_a$  crossed a threshold of  $35\text{--}36^\circ\text{C}$ , possums began actively cooling by increasing evaporative water loss and thermal conductance. It is clear that facultative hyperthermia is effective up to a point, but once this point is surpassed – the frequency and duration of which are increasing with climate change – body water would rapidly deplete, placing possums in danger of injury or death from dehydration.

**KEY WORDS:** Water loss, Metabolism, Energetics, Thermal tolerance, Pseudocheiridae, Climate change

**INTRODUCTION**

As the world's climates warm, heatwaves are predicted to increase in intensity, frequency and duration (Cowan et al., 2014; IPCC, 2013; Meehl and Tebaldi, 2004). Although relatively brief, heatwaves can bear long-lasting ecological consequences as they are associated with both sub-lethal (e.g. reduced body condition: Gardner et al., 2016) and lethal effects (Bird, 2009; Bondarenko et al., 2014; Finlayson, 1932; Kunkel et al., 1996; McKechnie et al., 2012; Saunders et al., 2011). As such, heatwaves will increasingly pose a globally significant problem for animal species.

Animals possess adaptations to persist despite fluctuations in the environment, from daily weather variability to seasonal patterns and long-term climatic trends (Norin and Metcalfe, 2019; Turner et al., 2017). However, there are limits to the breadth of conditions that animals can withstand (McKechnie and Wolf, 2010; Sergio et al., 2017). During heatwaves, as body temperature ( $T_b$ ) increases and approaches ambient temperature ( $T_a$ ), mammals and birds can dissipate some metabolic heat passively but will reach a  $T_a$  threshold where they must actively cool themselves via evaporative water loss (Briscoe et al., 2014; Speakman and Król, 2010; Welbergen et al., 2007). This rapidly heightens the risk of dehydration and hyperthermia, and surpassing this  $T_a$  threshold – even if only for a

few hours – can result in mortality (McKechnie and Wolf, 2010; Ratnayake et al., 2019; Welbergen et al., 2007). Both individual and mass mortality events pose a threat to many species – one that will worsen with more frequent extreme weather events (Meade et al., 2018; Ratnayake et al., 2019).

Die-offs are indicative of abiotic conditions stretching animals beyond their physiological limits. Extreme weather events jeopardise normally secure thermal refugia and an inability to escape excess heat can result in population crashes and changes in geographic distribution over time, as areas with tolerable climates shrink and shift (Briscoe et al., 2016; Kearney and Porter, 2017). Of the recent mass wildlife die-offs recorded worldwide, those caused by extreme heat were most conspicuous among Australia's arboreal fauna including ringtail possums, flying-foxes, koalas and birds (Cox, 2019; Gordon et al., 1988; Saunders et al., 2011; Towie, 2009; Welbergen et al., 2014, 2007). In most cases, dehydration, or a lack of access to water, was implicated as the driver of mortality. In fact, if body water cannot be replenished during prolonged heat exposure, rapid water loss via active cooling is likely to be the most significant factor causing animal death and injury at high  $T_a$ , not high  $T_a$  per se (McKechnie and Wolf, 2010; Riddell et al., 2019). Therefore, understanding the physiological responses of wildlife to the detrimental environmental conditions predicted to occur in the future will provide insight into how and where survival of these species is possible.

The common ringtail possum *Pseudocheirus peregrinus* (Boddaert 1785) is an arboreal marsupial that nests in spherical dreys in a range of forest types across multiple different climate zones in Australia, but is susceptible to extreme heat. I hypothesised that summer-acclimatised possums from a hot temperate climate would show physiological phenotypes conducive to survival at high temperature. To test this, I measured the metabolic, hygric and thermal biology of wild-caught possums exposed to a simulated heatwave.

**MATERIALS AND METHODS**

After sunset in late summer (18 March to 1 April 2019), common ringtail possums were found in Nine Mile Hill Travelling Stock Reserve ( $35.98^\circ\text{S}$ ,  $146.98^\circ\text{E}$ ), New South Wales, using spotlights. Individuals were captured by hand, weighed and sexed. A small patch of fur ( $\sim 20 \times 20\text{ mm}$ ) was trimmed from the right hind flank to calculate hair area density. Only adult males ( $n=5$ ) and non-reproductive females ( $n=5$ ) were studied and I measured one or two possums per night.

The study was approved by the Charles Sturt University Animal Care and Ethics Committee (Animal Research Authority no. A19003) and permission to capture and study possums on managed land was granted by the NSW Office of Environment and Heritage (licence no. SL102119) and NSW Local Land Services, Murray region, who generously waived the permit fee (permit no. 0064).

Institute for Land, Water and Society, Charles Sturt University, Albury, NSW 2640, Australia.

\*Author for correspondence (jaturner@csu.edu.au)

 J.M.T., 0000-0001-8699-7750

Received 26 November 2019; Accepted 5 February 2020

### Respirometry and heatwave treatment

Possums were transported ~10 km to Charles Sturt University and placed in a respirometry chamber [either a 16 l food storage container (HPL890; LOCK&LOCK Co. Ltd, Seoul, Gyeonggi, South Korea) or a custom-made 15 l acrylic tank (Blaze Displays, Albury, NSW, Australia)] in an open-flow respirometry system. Possums sat on a wire mesh platform above a thin layer of vegetable oil, which removed the effects of urine and faeces evaporation from water loss measurements. Respirometry chambers were placed inside a temperature-controlled cabinet (Westinghouse WRM1400, Electrolux Home Products Pty Ltd, Mascot, NSW, Australia), dimly illuminated by a red LED, and possums were observed using a low-light webcam (ELP-USBFHD06H-BL180, Ailipu Technology Co., Ltd, Shenzhen, Guangdong, China). Air was pumped into the system using an aquarium pump (SONIC P-85), dried using Drierite (W. A. Hammond Drierite Co. Ltd, Xenia, OH, USA) and sent to either (1) a gas pressure regulator/gauge (G261, Qubit Systems Inc., Kingston, ON, Canada) and a gas controller and monitor (G248, Qubit Systems Inc.) or (2) a rotameter (FLDA3420C, OMEGA Engineering Singapore, Singapore) and a mass flow meter (FMA-A2310, OMEGA Engineering Singapore). I used Bev-A-Line IV tubing throughout the system with some short sections of Tygon tubing (Saint-Gobain, Courbevoie, Île-de-France, France). Air entered the metabolic chambers at ~5–6.5 l min<sup>-1</sup>; brass inlet and outlet connections were vertically and diagonally unaligned and located at opposite ends of the chambers to facilitate air mixing. Excurrent air was subsampled via a syringe barrel manifold by a gas switcher (G243, Qubit Systems Inc.) at ~200 ml min<sup>-1</sup>. Subsampled air was measured for water vapour pressure by a dewpoint hygrometer (RH-300, Sable Systems International, Las Vegas, NV, USA), dried using Drierite and analysed for CO<sub>2</sub> then O<sub>2</sub> using a gas analysis system (S500, Qubit Systems Inc.). Gas analysers were zeroed before most measurements using compressed N<sub>2</sub> (BOC Ltd, North Ryde, NSW, Australia) and spanned against compressed 0.5% CO<sub>2</sub> in N<sub>2</sub> (CO<sub>2</sub> analyser), ambient air (O<sub>2</sub> analyser) or N<sub>2</sub> pushed through a bubbler flask (H<sub>2</sub>O analyser), as recommended by the manufacturers. Flow meters were factory calibrated. A chamber containing only vegetable oil was measured at 34°C to quantify its water content; this value was subtracted from possum water loss calculations.

During measurements, possums were exposed to a simulated heatwave. Overnight (from 23:23 h ±56 min), possums were held at 20°C and allowed to become accustomed to the system. At 07:00 h,  $T_a$  was increased to 25°C, within the thermal neutral zone of *P. peregrinus* (Munks, 1991). Animals were briefly removed from respirometry chambers at 09:00 h and, to monitor  $T_b$  for the rest of the measurement, a fine wire thermocouple connected to a digital thermometer (SDL200, Extech Instruments, Boston, MA, USA) was inserted 5–6 cm into the cloaca and taped to the base of the tail. At 10:00 h,  $T_a$  was increased in 2°C increments from 30 to 38°C at hourly intervals before being returned to 20°C at 15:00 h to facilitate cooling. This ramped  $T_a$  design meant measurements were not made of steady-state possums; instead, my aim was to replicate physiological responses to a natural heatwave as closely as possible. The rationale for not exposing possums to the higher  $T_a$  expected during a heatwave is related to the likelihood of exposure in the wild. Ringtail possums nest in dreys constructed on branches or within tree hollows. While no information on the internal temperature of dreys is available, they are similar in size and structure to the dreys of Eurasian red squirrels *Sciurus vulgaris*, which buffer  $T_a$  by up to 30°C in winter (Pulliainen, 1973; Thomson and Owen, 1964). In hot weather, possum dreys located in trunks are cooler than  $T_a$  (Jones et al., 1994;

Thomson and Owen, 1964) and tree hollows potentially used by ringtail possums provide considerable  $T_a$  buffering; hollow temperature in summer was predicted to reach only 26.1°C at a  $T_a$  of 40°C and an overall maximum of 38.1°C (Rowland et al., 2017). Additionally, possum behaviour suggests dreys built on branches also buffer  $T_a$  (Munks, 1991). Hence, during a heatwave, possums in dreys are unlikely to be exposed to  $T_a$  much above 38°C. I did not actively search for dreys; however, none were seen in the study site and ringtails were observed entering and leaving tree hollows on several occasions, suggesting that they may use hollows more often than dreys in this forest.

To prevent injury from hyperthermia, I used a hypothetical non-lethal thermal tolerance limit of 2°C above the reported daily maximum  $T_b$  (after Whitfield et al., 2015), which was approximately 39°C for *P. peregrinus* (Kinnear and Shield, 1975; Krockenberger et al., 2012; Munks, 1991). If any individuals reached this  $T_b$ , measurements were immediately stopped and the possum was cooled using a fan. Possums were measured once each, offered water from a syringe before and after measurements, and released at their point of capture during the ensuing evening; all animals were in captivity <24 h.

I measured metabolic rate (oxygen consumption,  $\dot{V}_{O_2}$ ; and carbon dioxide production,  $\dot{V}_{CO_2}$ ) and evaporative water loss (EWL; calculated after Withers, 2001), averaged during 20 min periods when values were low and stable. Metabolic heat production (MHP) and metabolic water production (MWP) were calculated using oxy-calorific and hygric coefficients for the measured respiratory exchange ratio and EWL was converted to evaporative heat loss (EHL) assuming a latent heat of evaporation of 2.4 J mg<sup>-1</sup> H<sub>2</sub>O (McNab, 2002). Wet ( $C_{wet}$ ) and dry ( $C_{dry}$ ) thermal conductance were calculated as MHP/( $T_b - T_a$ ) and (MHP - EHL)/( $T_b - T_a$ ), respectively (McNab, 2002), where  $T_b$  is body temperature and  $T_a$  is ambient temperature. Relative water economy (RWE) was calculated as MWP/EWL (Withers et al., 2016) and evaporative cooling capacity (ECC) as EHL/MHP (Smith et al., 2015). Possums were weighed immediately before and after measurements and a linear rate of mass loss was assumed for metabolic rate calculations.

When a single possum was measured, animal air and reference air were sampled alternately for 54 and 6 min, respectively, using Qubit C950 version 3.8.9 ( $\dot{V}_{O_2}$  and  $\dot{V}_{CO_2}$ ) and Sable Systems ExpeData release 1.9.22 (EWL). When two possums were in the system, I measured each animal for either 4.5 or 9 min, cycled in sequence for 54 min, followed by reference air for 6 min. Therefore, reference air was measured once per hour and this was used to drift-correct traces in ExpeData.

### Statistical analysis

Data were recorded using Qubit C950 version 3.8.9 and ExpeData release 1.9.22. To allow for non-linear relationships, the effect of predictor variable  $T_a$  on response variables  $T_b$ ,  $\dot{V}_{O_2}$ ,  $\dot{V}_{CO_2}$ ,  $C_{wet}$ ,  $C_{dry}$ , EWL, RWE and ECC was examined using generalised additive mixed models in RStudio v1.2.1335 (using R version 3.5.0) with package ‘*gam4*’ (<https://CRAN.R-project.org/package=gam4>). Sex, body mass and hair area density were included as fixed factors alongside individual as a random factor. Residuals were examined visually for departure from a normal distribution. Subsequently, I calculated inflection points for  $C_{wet}$  and EWL curves to estimate a threshold  $T_a$  initiating rapid increases in physiological cooling using the package ‘*segmented*’ (<https://CRAN.R-project.org/package=segmented>) in RStudio. Data are presented as means ± s.e.m.,  $n$  = number of individuals.

## RESULTS AND DISCUSSION

Possum body mass was  $771.5 \pm 16.5$  g ( $n=10$ ) and hair area density was  $0.19 \pm 0.02$  mg mm<sup>-2</sup> ( $n=10$ ).

$T_a$  before and during the heatwave had a significant effect on six out of eight measured or calculated variables (Table 1); the remaining two ( $\dot{V}_{CO_2}$  and  $C_{dry}$ ) were non-significant ( $P \leq 0.099$ ; Table 1).  $T_b$  during measurements ranged from 34.7 to 39.2°C; one possum was removed from the system and cooled when its  $T_b$  exceeded 39°C after ~30 min of exposure to  $T_a > 37^\circ\text{C}$ . At high  $T_a$ , individuals lay on their backs or sides, spread their limbs and licked their fur, presumably to expedite cooling. Mean  $T_b$  before and after the heatwave ( $T_a = 19.4\text{--}27.3^\circ\text{C}$ ) was  $36.1 \pm 0.01^\circ\text{C}$  ( $n=10$ ). During the heatwave ( $T_a = 23.0\text{--}39.0^\circ\text{C}$ ),  $T_b$  increased almost linearly by ~3°C (Fig. 1A, Table 1).  $T_b$  equalled  $T_a$  at 38.6°C.  $\dot{V}_{O_2}$  had a slightly curvilinear response to  $T_a$  but remained reasonably stable over the measured  $T_a$  range (Fig. 1B, Table 1). It is therefore difficult to estimate the thermal neutral zone; however, the lowest point on the curve was at  $T_a = 26.4^\circ\text{C}$ , where  $\dot{V}_{O_2} = 0.53$  ml O<sub>2</sub> g<sup>-1</sup> h<sup>-1</sup>.

$C_{wet}$  increased slowly with increasing  $T_a$  before increasing rapidly as  $T_a$  approached  $T_b$  (Fig. 1C, Table 1); the inflection point was estimated at a  $T_a$  of  $36.0 \pm 0.6^\circ\text{C}$ , when  $T_b$  was  $37.9^\circ\text{C}$ . A similar pattern was observed for EWL (Fig. 1D, Table 1) and the estimated inflection point, where EWL began to rise sharply, was  $34.7 \pm 0.9^\circ\text{C}$ . RWE remained below 0.5 over the  $T_a$  range measured, indicating

that possums were in a constant water deficit (EWL exceeds metabolic water production when  $RWE < 1$ ). RWE decreased as  $T_a$  increased (Fig. 1E, Table 1) and  $RWE = 1$  at  $T_a = -26.0^\circ\text{C}$ . ECC also increased at high  $T_a$  (Fig. 1F, Table 1) and  $ECC = 1$  (i.e. where  $MHP = EHL$ ) at  $T_a = 38.4^\circ\text{C}$ .

When  $T_a$  exceeds  $T_b$ , the only method of cooling available to endothermic animals is EWL, which places them at risk of becoming rapidly dehydrated. The common ringtail possums in this study used facultative hyperthermia to delay EWL, thereby conserving water at high  $T_a$  during a heatwave. By allowing  $T_b$  to increase with  $T_a$  to ~3°C above the baseline level, they maintained a positive thermal gradient with the environment (i.e.  $T_b > T_a$ ), facilitating passive heat loss via convection. Such a strategy is likely to prove vital for surviving increasingly frequent extreme weather events. Using equations in Tieleman and Williams (1999), at a  $T_a$  of 39°C, possums can save 9.6 ml of water every hour using facultative hyperthermia.

Metabolic rate, and thereby metabolic heat production, remained low and stable during the heatwave experiment. This indicates that it was reasonably energetically inexpensive for possums to warm themselves at low  $T_a$ , and to cool at high  $T_a$ , across this  $T_a$  range. Because endogenous metabolic heat production and thermal conductance ( $C_{wet}$  and  $C_{dry}$ ) remained quite stable as  $T_a$  increased, the accumulating heat load from the air contributed to

**Table 1. Results of generalised additive mixed models describing the relationship between predictor variable  $T_a$  and common ringtail possum response variables measured ( $T_b$ ,  $\dot{V}_{O_2}$ ,  $\dot{V}_{CO_2}$ , EWL) or calculated ( $C_{wet}$ ,  $C_{dry}$ , RWE, ECC) during a simulated heatwave**

| Response variable | Smoothed terms |               |                  |                              | Linear terms        |               |              |               |                  |
|-------------------|----------------|---------------|------------------|------------------------------|---------------------|---------------|--------------|---------------|------------------|
|                   | edf            | <i>F</i>      | <i>P</i>         | <i>R</i> <sup>2</sup> (adj.) | Factor              | Coefficient   | s.e.         | <i>t</i>      | <i>P</i>         |
| $T_b$             | <b>2.428</b>   | <b>127.80</b> | <b>&lt;0.001</b> | <b>0.718</b>                 | Intercept ( $T_a$ ) | <b>40.736</b> | <b>2.505</b> | <b>16.259</b> | <b>&lt;0.001</b> |
|                   |                |               |                  |                              | Sex                 | 0.016         | 0.338        | 0.046         | 0.963            |
|                   |                |               |                  |                              | Mass                | -0.004        | 0.003        | -1.362        | 0.183            |
|                   |                |               |                  |                              | Hair                | -0.721        | 2.328        | -0.310        | 0.759            |
|                   |                |               |                  |                              | Intercept ( $T_a$ ) | 0.1934        | 1.690        | 0.115         | 0.909            |
| $\dot{V}_{O_2}$   | <b>2.105</b>   | <b>3.25</b>   | <b>0.0412</b>    | <b>0.237</b>                 | Sex                 | -0.292        | 0.218        | -1.338        | 0.188            |
|                   |                |               |                  |                              | Mass                | 0.0005        | 0.002        | 0.245         | 0.808            |
|                   |                |               |                  |                              | Hair                | 0.7021        | 1.411        | 0.498         | 0.621            |
|                   |                |               |                  |                              | Intercept ( $T_a$ ) | -0.124        | 0.593        | -0.210        | 0.835            |
|                   |                |               |                  |                              | Sex                 | -0.142        | 0.077        | -1.857        | 0.070            |
| $\dot{V}_{CO_2}$  | 2.279          | 2.74          | 0.0577           | 0.394                        | Mass                | 0.0004        | 0.0008       | 0.568         | 0.573            |
|                   |                |               |                  |                              | Hair                | 0.816         | 0.494        | 1.651         | 0.106            |
|                   |                |               |                  |                              | Intercept ( $T_a$ ) | -12.143       | 22.257       | -0.546        | 0.591            |
|                   |                |               |                  |                              | Sex                 | 1.429         | 2.991        | 0.478         | 0.638            |
|                   |                |               |                  |                              | Mass                | 0.018         | 0.029        | 0.644         | 0.526            |
| $C_{wet}$         | <b>2.953</b>   | <b>12.83</b>  | <b>&lt;0.001</b> | <b>0.595</b>                 | Hair                | 26.217        | 18.404       | 1.425         | 0.168            |
|                   |                |               |                  |                              | Intercept ( $T_a$ ) | -22.395       | 14.058       | -1.593        | 0.124            |
|                   |                |               |                  |                              | Sex                 | 1.814         | 1.902        | 0.954         | 0.349            |
|                   |                |               |                  |                              | Mass                | 0.028         | 0.018        | 1.534         | 0.136            |
|                   |                |               |                  |                              | Hair                | 16.963        | 11.753       | 1.443         | 0.161            |
| $C_{dry}$         | 1              | 2.995         | 0.096            | 0.137                        | Intercept ( $T_a$ ) | 6.916         | 5.540        | 1.248         | 0.218            |
|                   |                |               |                  |                              | Sex                 | -0.835        | 0.719        | -1.161        | 0.251            |
|                   |                |               |                  |                              | Mass                | -0.006        | 0.007        | -0.775        | 0.442            |
|                   |                |               |                  |                              | Hair                | -0.176        | 5.035        | -0.035        | 0.972            |
|                   |                |               |                  |                              | Intercept ( $T_a$ ) | -0.423        | 0.413        | -1.025        | 0.311            |
| EWL               | <b>3.043</b>   | <b>25.58</b>  | <b>&lt;0.001</b> | <b>0.510</b>                 | Sex                 | -0.101        | 0.053        | -1.892        | 0.065            |
|                   |                |               |                  |                              | Mass                | 0.001         | 0.001        | 1.589         | 0.120            |
|                   |                |               |                  |                              | Hair                | 0.191         | 0.343        | 0.556         | 0.581            |
|                   |                |               |                  |                              | Intercept ( $T_a$ ) | 2.348         | 1.280        | 1.834         | 0.074            |
|                   |                |               |                  |                              | Sex                 | 0.248         | 0.166        | 1.495         | 0.143            |
| RWE               | <b>1.974</b>   | <b>50.02</b>  | <b>&lt;0.001</b> | <b>0.660</b>                 | Mass                | -0.002        | 0.002        | -1.418        | 0.164            |
|                   |                |               |                  |                              | Hair                | -0.713        | 1.064        | -0.670        | 0.506            |
|                   |                |               |                  |                              | Intercept ( $T_a$ ) | -0.423        | 0.413        | -1.025        | 0.311            |
|                   |                |               |                  |                              | Sex                 | -0.101        | 0.053        | -1.892        | 0.065            |
|                   |                |               |                  |                              | Mass                | 0.001         | 0.001        | 1.589         | 0.120            |
| ECC               | <b>2.976</b>   | <b>26.44</b>  | <b>&lt;0.001</b> | <b>0.564</b>                 | Hair                | 0.191         | 0.343        | 0.556         | 0.581            |
|                   |                |               |                  |                              | Intercept ( $T_a$ ) | 2.348         | 1.280        | 1.834         | 0.074            |
|                   |                |               |                  |                              | Sex                 | 0.248         | 0.166        | 1.495         | 0.143            |
|                   |                |               |                  |                              | Mass                | -0.002        | 0.002        | -1.418        | 0.164            |
|                   |                |               |                  |                              | Hair                | -0.713        | 1.064        | -0.670        | 0.506            |

$T_a$ , ambient temperature;  $T_b$ , body temperature;  $\dot{V}_{O_2}$ , oxygen consumption;  $\dot{V}_{CO_2}$ , CO<sub>2</sub> production; EWL, evaporative water loss;  $C_{wet}$ , wet thermal conductance;  $C_{dry}$ , dry thermal conductance; RWE, relative water economy; ECC, evaporative cooling capacity. Bold values indicate a significant relationship ( $P < 0.05$ ). Smoothed terms show the effect of  $T_a$  on each response variable (edf, estimated degrees of freedom), accounting for non-linear relationships. Linear terms show whether fixed factors sex, body mass and hair area density affected the response variable.

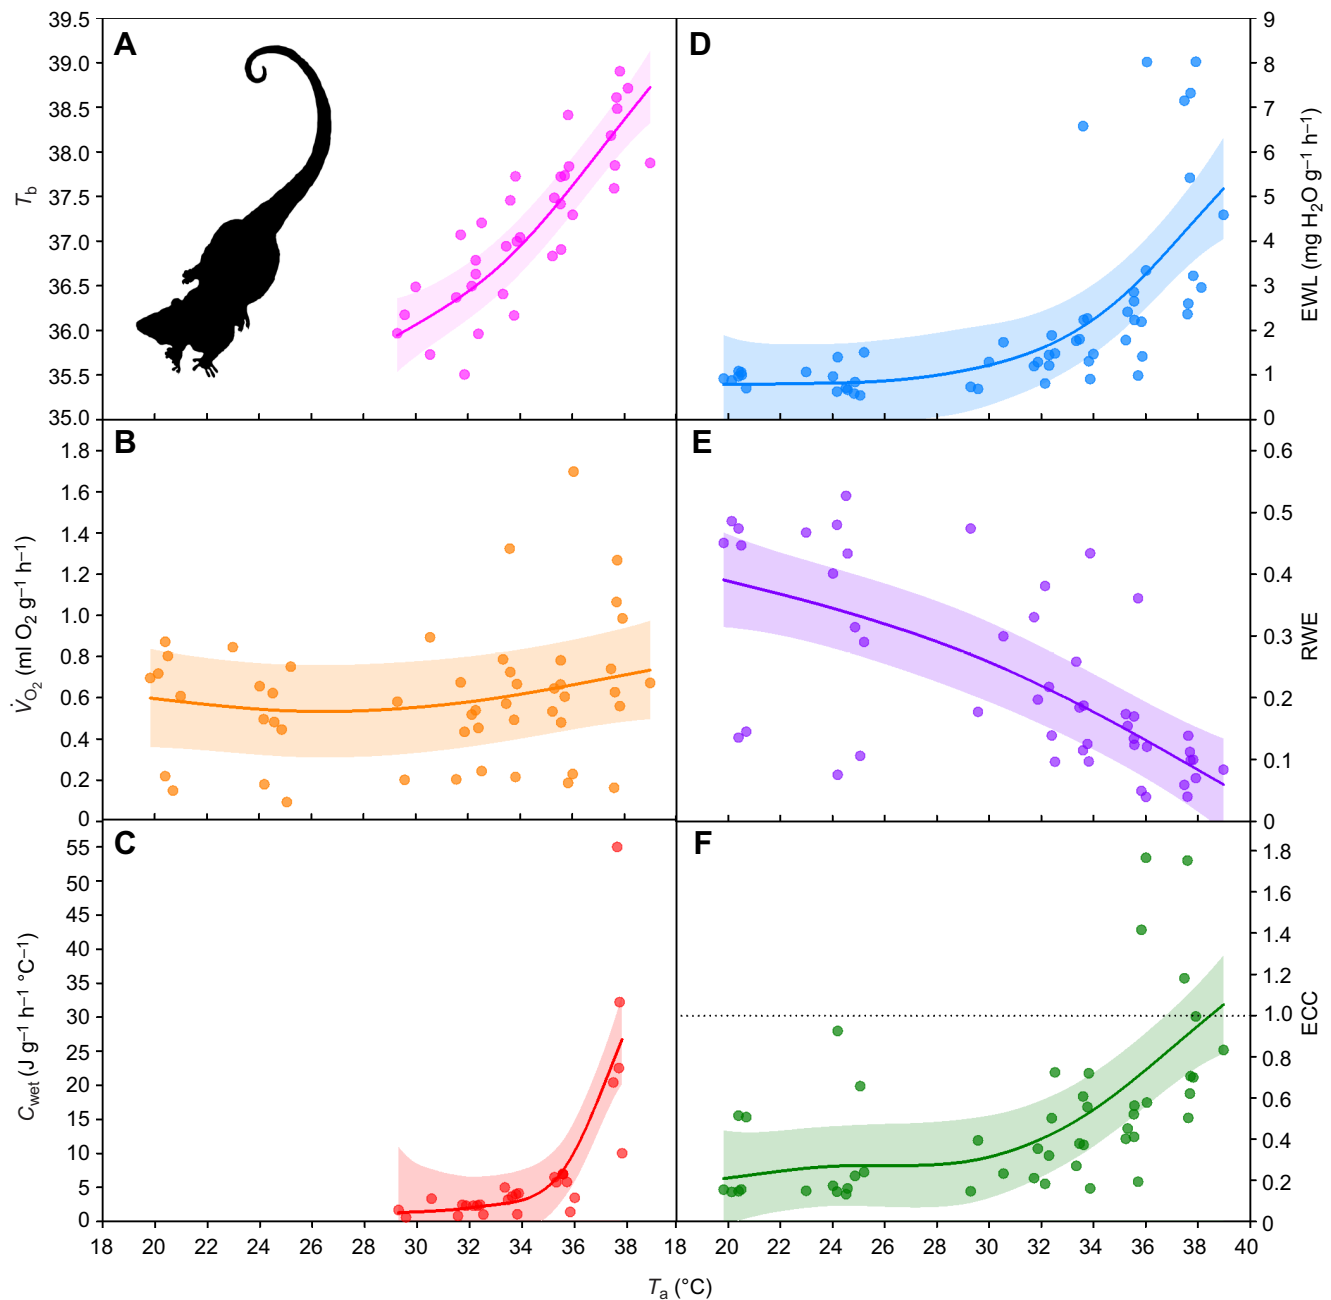

**Fig. 1. Physiological responses of 10 common ringtail possums to a simulated heatwave.** Variables are body temperature ( $T_b$ ; A), metabolic rate ( $\dot{V}_{O_2}$ ; B), wet thermal conductance ( $C_{wet}$ ; C), evaporative water loss (EWL; D), relative water economy (RWE; E) and evaporative cooling capacity (ECC; F) as a function of ambient temperature ( $T_a$ ). Filled circles are individual means, curves represent significant relationships predicted by generalised additive mixed models and the shaded areas are bounded within 95% confidence intervals. The horizontal dotted line where  $ECC=1$  indicates the point where metabolic heat production equals evaporative heat loss (i.e. when  $ECC<1$ , heat production exceeds heat loss; when  $ECC>1$ , heat loss exceeds heat production).

the observed increase in  $T_b$ . When  $T_a$  was about 35–36°C, possums began actively cooling themselves at a much higher rate, reflected in the rapid increase in EWL and  $C_{wet}$  (Fig. 1). The capacity for EWL is possibly limited because heat loss exceeded heat production (i.e.  $ECC<1$ ) until  $T_a=38.4^\circ\text{C}$ , and the scope for facultative hyperthermia is probably limited by the ability of a small possum to replenish sufficient water to maintain high rates of EWL (Krockenberger et al., 2012). However, independent of water replenishment, the water-saving effects of facultative hyperthermia have been shown for 33 bird species over a 36-fold body mass range (Gerson et al., 2019).

Possums lost more water than they produced over the entire measured  $T_a$  range (i.e.  $RWE<1$ ) and the rate of loss was positively correlated with  $T_a$  (Fig. 1). This shows that ringtail possums are perhaps particularly susceptible to water stress and the ability to replenish lost body water will be the primary factor limiting their survival during heatwaves. Theoretically, if animals are able to remain hydrated, they can persist for extended periods at high  $T_a$  without injury (McKechnie and Wolf, 2019; Mitchell et al., 2018). However, possums must contend with dietary plant secondary metabolites – naturally occurring toxins that limit the type and amount of food folivores can consume – and the ability of animals to

process these compounds decreases with increasing  $T_a$  (Beale et al., 2018; Moore et al., 2015). Given that 55% of a ringtail possum's water intake comes from leaves (Munks, 1991), these toxins are likely to constrain rehydration and survival with projected global warming in general, and during heatwaves in particular (Mella et al., 2019; Moore et al., 2015). Possums can avoid consuming leaves at high  $T_a$ , but reduced foraging will lead to decreased body condition and dehydration (Conradie et al., 2019; Mella et al., 2019), and may impact the growth of young (Cunningham et al., 2013). Provision of free water to offset reduced intake of leaf water has been trialled for the arboreal and folivorous koala *Phascolarctos cinereus*, which increased use of supplemented water at high  $T_a$  (Mella et al., 2019), but such strategies are still impractical beyond a local scale. It has been suggested that water loss would become physiologically limiting when green ringtail possums *Pseudochirops archeri* are exposed to  $T_a > 30^\circ\text{C}$  for  $> 5$  h per day during heatwaves of 4–6 days, the effect of which would be exacerbated with climate change (Krockenberger et al., 2012; Meade et al., 2018). Even with the water savings of  $9.6 \text{ ml h}^{-1}$  achieved by facultative hyperthermia, *P. peregrinus* could lose 11% of its mass in body water, a point of significant physiological impairment (McKechnie and Wolf, 2010; Patton and Thibodeau, 2013), as quickly as 17.5 h at  $39^\circ\text{C}$ . This point would be reached after 14.1 h at  $43.3^\circ\text{C}$ , the average daily maximum  $T_a$  of a 5 day heatwave that occurred at the field site in January 2019 (Australian Bureau of Meteorology).  $T_a$  stayed above  $35^\circ\text{C}$ , *P. peregrinus*' threshold for rapid evaporative cooling, for 10.2 h every day during this heatwave.

The slow change in metabolic and hygric variables when  $T_b$  warms towards  $T_a$  indicates that facultative hyperthermia is an adaptive response that common ringtail possums use to contend with high  $T_a$ . This response is potentially common among mammals (Withers, 1992) and has been documented for a number of marsupials, including other possums (Robinson and Morrison, 1957), and birds (Gerson et al., 2019). While this may indicate a level of resilience to heatwaves, the threshold  $T_a$  is most likely species specific (McKechnie and Wolf, 2019) and may vary with body size and condition among individuals (Gerson et al., 2019). Its success will also rely on the ability of animals to replace lost water and behaviourally thermoregulate by, for example, seeking shade or cooler microclimates within a habitat. Ultimately, facultative hyperthermia is an unstable physiological state, which relies on  $T_a$  staying below a critical threshold. It is clear that when the threshold is surpassed, animals must respond rapidly by employing evaporative cooling to avoid death, but it is this very process which imperils them further and accelerates dehydration.

#### Acknowledgements

This study took place on Wiradjuri country. I thank the many field volunteers for their help. Charles Sturt University technical staff provided invaluable logistical support. N. Dowling from Qubit rescued data collection with exceptional technical support. J. U. Van Dyke and R.-J. Spencer graciously loaned me their respirometry equipment. D. G. Nimmo gave statistical advice. The study benefitted from discussions with K. J. Marsh, P. K. Beale and W. J. Foley, and L. Warnecke and C. E. Cooper provided helpful feedback on an early draft of the manuscript.

#### Competing interests

The author declares no competing or financial interests.

#### Funding

This project was funded by the Charles Sturt University Faculty of Science and Institute for Land, Water and Society.

#### Data availability

Data are available from figshare (Turner, 2020): <https://doi.org/10.6084/m9.figshare.11900295.v1>.

#### References

- Beale, P. K., Marsh, K. J., Foley, W. J. and Moore, B. D. (2018). A hot lunch for herbivores: physiological effects of elevated temperatures on mammalian feeding ecology. *Biol. Rev.* **93**, 674–692. doi:10.1111/brv.12364
- Bird, P. (2009). Heatwave mammal deaths. Australian Mammal Society Newsletter, October 2009, p. 22.
- Bondarenco, A., Körtner, G. and Geiser, F. (2014). Hot bats: extreme thermal tolerance in a desert heat wave. *Naturwissenschaften* **101**, 679–685. doi:10.1007/s00114-014-1202-2
- Briscoe, N. J., Handasyde, K. A., Griffiths, S. R., Porter, W. P., Krockenberger, A. and Kearney, M. R. (2014). Tree-hugging koalas demonstrate a novel thermoregulatory mechanism for arboreal mammals. *Biol. Lett.* **10**, 20140235. doi:10.1098/rsbl.2014.0235
- Briscoe, N. J., Kearney, M. R., Taylor, C. A. and Wintle, B. A. (2016). Unpacking the mechanisms captured by a correlative species distribution model to improve predictions of climate refugia. *Glob. Change Biol.* **22**, 2425–2439. doi:10.1111/gcb.13280
- Conradie, S. R., Woodborne, S. M., Cunningham, S. J. and McKechnie, A. E. (2019). Chronic, sublethal effects of high temperatures will cause severe declines in southern African arid-zone birds during the 21st century. *Proc. Natl. Acad. Sci. USA* **116**, 14065–14070. doi:10.1073/pnas.1821312116
- Cowan, T., Purich, A., Perkins, S., Pezza, A., Boschat, G. and Sadler, K. (2014). More frequent, longer, and hotter heat waves for Australia in the twenty-first century. *J. Clim.* **27**, 5851–5871. doi:10.1175/JCLI-D-14-00092.1
- Cox, L. (2019). 'Falling out of trees': dozens of dead possums blamed on extreme heat stress. *The Guardian*. <https://www.theguardian.com/environment/2019/mar/07/falling-out-of-trees-dozens-of-dead-possums-blamed-on-extreme-heat-stress>
- Cunningham, S. J., Martin, R. O., Hojem, C. L. and Hockey, P. A. R. (2013). Temperatures in excess of critical thresholds threaten nestling growth and survival in a rapidly-warming arid savanna: a study of common ferals. *PLoS ONE* **8**, e74613. doi:10.1371/journal.pone.0074613
- Finlayson, H. (1932). Heat in the interior of South Australia: holocaust of bird-life. *S. Aust. Ornithol.* **11**, 158–160.
- Gardner, J. L., Amamo, T., Sutherland, W. J., Clayton, M. and Peters, A. (2016). Individual and demographic consequences of reduced body condition following repeated exposure to high temperatures. *Ecology* **97**, 786–795. doi:10.1890/15-0642.1
- Gerson, A. R., McKechnie, A. E., Smit, B., Whitfield, M. C., Smith, E. K., Talbot, W. A., McWhorter, T. J., Wolf, B. O. and Williams, T. (2019). The functional significance of facultative hyperthermia varies with body size and phylogeny in birds. *Funct. Ecol.* **33**, 597–607. doi:10.1111/1365-2435.13274
- Gordon, G., Brown, A. S. and Pulsford, T. (1988). A koala (*Phascolarctos cinereus* Goldfuss) population crash during drought and heatwave conditions in south-western Queensland. *Aust. J. Ecol.* **13**, 451–461. doi:10.1111/j.1442-9993.1988.tb00993.x
- IPCC (2013). Summary for policymakers. In *Climate Change 2013: The Physical Science Basis* (ed. T. Stocker, D. Qin, G.-K. Plattner, M. Tignor, S. Allen, J. Boschung, A. Nauels, Y. Xia, V. Bex and P. Midgley). Cambridge, UK: Cambridge University Press.
- Jones, B. A., How, R. A. and Kitchener, D. J. (1994). A field study of *Pseudocheirus occidentalis* (Marsupialia: Petauridae) I. Distribution and habitat. *Wildl. Res.* **21**, 175–187. doi:10.1071/MR9940175
- Kearney, M. R. and Porter, W. P. (2017). NicheMapR - an R package for biophysical modelling: the microclimate model. *Ecography* **40**, 664–674. doi:10.1111/ecog.02360
- Kinney, A. and Shield, J. W. (1975). Metabolism and temperature regulation in marsupials. *Comp. Biochem. Physiol. A* **52**, 235–245. doi:10.1016/S0300-9629(75)80159-9
- Krockenberger, A. K., Edwards, W. and Kanowski, J. (2012). The limit to the distribution of a rainforest marsupial folivore is consistent with the thermal intolerance hypothesis. *Oecologia* **168**, 889–899. doi:10.1007/s00442-011-2146-2
- Kunkel, K. E., Changnon, S. A., Reinke, B. C. and Arritt, R. W. (1996). The July 1995 heat wave in the Midwest: a climatic perspective and critical weather factors. *Bull. Am. Meteorol. Soc.* **77**, 1507–1518. doi:10.1175/1520-0477(1996)077<1507:TJHWIT>2.0.CO;2
- McKechnie, A. E. and Wolf, B. O. (2010). Climate change increases the likelihood of catastrophic avian mortality events during extreme heat waves. *Biol. Lett.* **6**, 253–256. doi:10.1098/rsbl.2009.0702
- McKechnie, A. E. and Wolf, B. O. (2019). The physiology of heat tolerance in small endotherms. *Physiology (Bethesda)* **34**, 302–313. doi:10.1152/physiol.00011.2019
- McKechnie, A. E., Hockey, P. A. and Wolf, B. O. (2012). Feeling the heat: Australian landbirds and climate change. *Emu* **112**, i–vii. doi:10.1071/MUv112n2\_ED
- McNab, B. K. (2002). *The Physiological Ecology of Vertebrates*. Ithaca, NY: Cornell University Press.
- Meade, J., VanDerWal, J., Storie, C., Williams, S., Gourret, A., Krockenberger, A. and Welbergen, J. A. (2018). Substantial reduction in thermo-suitable microhabitat for a rainforest marsupial under climate change. *Biol. Lett.* **14**, 20180189. doi:10.1098/rsbl.2018.0189

- Meehl, G. A. and Tebaldi, C.** (2004). More intense, more frequent, and longer lasting heat waves in the 21st century. *Science* **305**, 994–997. doi:10.1126/science.1098704
- Mella, V. S. A., McArthur, C., Krockenberger, M. B., Frend, R. and Crowther, M. S.** (2019). Needing a drink: rainfall and temperature drive the use of free water by a threatened arboreal folivore. *PLoS ONE* **14**, e0216964. doi:10.1371/journal.pone.0216964
- Mitchell, D., Snelling, E. P., Hetem, R. S., Maloney, S. K., Strauss, W. M. and Fuller, A.** (2018). Revisiting concepts of thermal physiology: predicting responses of mammals to climate change. *J. Anim. Ecol.* **84**, 956–973. doi:10.1111/1365-2656.12818
- Moore, B. D., Wiggins, N. L., Marsh, K. J., Dearing, M. D. and Foley, W. J.** (2015). Translating physiological signals to changes in feeding behaviour in mammals and the future effects of global climate change. *Anim. Prod. Sci.* **55**, 272–283. doi:10.1071/AN14487
- Munks, S. A.** (1991). Ecological energetics and reproduction in the common ringtail possum, *Pseudocheirus peregrinus* (Marsupialia: Phalangeridae). *PhD thesis*, pp. 344. Hobart: University of Tasmania.
- Norin, T. and Metcalfe, N. B.** (2019). Ecological and evolutionary consequences of metabolic rate plasticity in response to environmental change. *Philos. Trans. R. Soc. B Biol. Sci.* **374**, 20180180. doi:10.1098/rstb.2018.0180
- Patton, K. T. and Thibodeau, G. A.** (2013). *Anatomy & Physiology*. St. Louis: Mosby, Inc.
- Pullianen, E.** (1973). Winter ecology of the red squirrel (*Sciurus vulgaris* L.) in northeastern Lapland. *Ann. Zool. Fenn.* **10**, 487–494.
- Ratnayake, H. U., Kearney, M. R., Govekar, P., Karoly, D. and Welbergen, J. A.** (2019). Forecasting wildlife die-offs from extreme heat events. *Anim. Conserv.* **22**, 386–395. doi:10.1111/acv.12476
- Riddell, E. A., Iknayan, K. J., Wolf, B. O., Sinervo, B. and Beissinger, S. R.** (2019). Cooling requirements fueled the collapse of a desert bird community from climate change. *Proc. Natl. Acad. Sci. USA* **116**, 21609–21615. doi:10.1073/pnas.1908791116
- Robinson, K. W. and Morrison, P. R.** (1957). The reaction to hot atmospheres of various species of Australian marsupial and placental animals. *J. Cell. Comp. Physiol.* **49**, 455–478. doi:10.1002/jcp.1030490306
- Rowland, J. A., Briscoe, N. J. and Handasyde, K. A.** (2017). Comparing the thermal suitability of nest-boxes and tree-hollows for the conservation-management of arboreal marsupials. *Biol. Conserv.* **209**, 341–348. doi:10.1016/j.biocon.2017.02.006
- Saunders, D. A., Mawson, P. and Dawson, R.** (2011). The impact of two extreme weather events and other causes of death on Carnaby's Black Cockatoo: a promise of things to come for a threatened species? *Pac. Conserv. Biol.* **17**, 141–148. doi:10.1071/PC110141
- Sergio, F., Blas, J. and Hiraldo, F.** (2017). Animal responses to disturbance and climate extremes: a review. *Glob. Planet. Change* **161**, 28–40. doi:10.1016/j.gloplacha.2017.10.009
- Smith, E. K., O'Neill, J., Gerson, A. R. and Wolf, B. O.** (2015). Avian thermoregulation in the heat: resting metabolism, evaporative cooling and heat tolerance in Sonoran desert doves and quail. *J. Exp. Biol.* **218**, 3636–3646. doi:10.1242/jeb.128645
- Speakman, J. R. and Król, E.** (2010). Maximal heat dissipation capacity and hyperthermia risk: neglected key factors in the ecology of endotherms. *J. Anim. Ecol.* **79**, 726–746. doi:10.1111/j.1365-2656.2010.01689.x
- Thomson, J. A. and Owen, W. H.** (1964). A field study of the Australian ringtail possum *Pseudocheirus peregrinus* (Marsupialia: Phalangeridae). *Ecol. Monogr.* **34**, 27–52. doi:10.2307/1948462
- Tielemans, B. I. and Williams, J. B.** (1999). The role of hyperthermia in the water economy of desert birds. *Physiol. Biochem. Zool.* **72**, 87–100. doi:10.1086/316640
- Towie, N.** (2009). *Thousands of Birds die in Sweltering Heat*: PerthNow.
- Turner, J.** (2020). Facultative hyperthermia during a heatwave delays injurious dehydration of an arboreal marsupial. figshare. Dataset. <https://doi.org/10.6084/m9.figshare.11900295.v1>.
- Turner, J. M., Reher, S., Warnecke, L. and Dausmann, K. H.** (2017). Eurasian red squirrels show little seasonal variation in metabolism in food-enriched habitat. *Physiol. Biochem. Zool.* **90**, 655–662. doi:10.1086/694847
- Welbergen, J. A., Klose, S. M., Markus, N. and Eby, P.** (2007). Climate change and the effects of temperature extremes on Australian flying-foxes. *Proc. R. Soc. B* **275**, 419–425. doi:10.1098/rspb.2007.1385
- Welbergen, J. A., Booth, C. and Martin, J.** (2014). Killer climate: tens of thousands of flying foxes dead in a day. *The Conversation*. <http://theconversation.com/killer-climate-tens-of-thousands-of-flying-foxes-dead-in-a-day-23227>
- Whitfield, M. C., Smit, B., McKechnie, A. E. and Wolf, B. O.** (2015). Avian thermoregulation in the heat: scaling of heat tolerance and evaporative cooling capacity in three southern African arid-zone passerines. *J. Exp. Biol.* **218**, 1705–1714. doi:10.1242/jeb.121749
- Withers, P. C.** (1992). *Comparative Animal Physiology*. USA: Saunders College Publishing.
- Withers, P. C.** (2001). Design, calibration and calculation for flow-through respirometry systems. *Aust. J. Zool.* **49**, 445–461. doi:10.1071/ZO00057
- Withers, P. C., Cooper, C. E., Maloney, S. K., Bozinovic, F. and Cruz-Neto, A. P.** (2016). *Ecological and Environmental Physiology of Mammals*. Oxford, UK: Oxford University Press.
